# Supplementary material for: Use ATCCfinder to identify commercially available American Type Culture Collection strains based on sequence queries
Source: PeerJ journal article supplement (doi:10.7717/peerj.19832), 2025-08-13
Supplement: Supplemental_Document_2_query_custom_database_Staphylococcus.docx [file Supplemental_Document_2_query_custom_database_Staphylococcus.docx]

**Query a custom database: *Staphylococcus***

Here, we demonstrate how to use *ATCCfinder* with a custom database to query the penicillin binding protein PBP2A (mecA) gene sequence against references in the genus *Staphylococcus,* many of which are strains of *Staphylococcus aureus,* to report references containing this sequence.

The following protocol should be performed on a computer with internet access. Downloaded sequences will be ~81 megabytes uncompressed. Note that if computer storage is limited, *ATCCfinder* can handle compressed query and target files. Ability to use command line for executing code is required. A data table visualization software, such as Microsoft Excel, is recommended but not necessary for viewing results files.

Download query sequence from NCBI-Nucleotide database

1. Navigate to the NCBI-nucleotide search page: <https://www.ncbi.nlm.nih.gov/nuccore/>
2. Paste accession “MH798864.1” into the search bar (Figure 1).

**Figure 1. Search query in NCBI-nucleotide database.** Accession codes are entered into the search bar (outlined, red).

1. Search results should proceed directly to the “MH798864.1” accession page (Figure 2). Select the FASTA format option and then download the sequences by selecting “Send to” and ensuring “Complete Record” and “File” are selected (Figure 2).

**Figure 2. NCBI-Nucleotide search result page for accession “MH798864.1”.** Select “Send to” (outlined, red) to expand the drop down menu, select “FASTA” format (outlined, orange), and select “Create File” (outlined, yellow) to initiate the download prompt. Note that it may be necessary to select “File” under “Choose Destination” in order to view “Format” and “Create File” options.

1. The selected sequence will now be downloaded to your computer. A prompt will appear to specify download location and filename. The downloaded file will hereafter be referred to as “MH798864.1.fasta”. The query sequence file has now been downloaded.

Download *Staphylococcus* target database sequences from NCBI-Genome database

A list of *Staphylococcus* genomes were curated for custom database searching. Selected references are high quality (Assembly.Level = “complete”) and comprise a variety and strains (Table 1).

| **Organism.Name** | **Assembly.Accession** |
| --- | --- |
| *Staphylococcus aureus* | GCF_004771515.1 |
| *Staphylococcus aureus* | GCF_000418345.1 |
| *Staphylococcus aureus* | GCF_013187685.1 |
| *Staphylococcus aureus 08BA02176* | GCF_000296595.1 |
| *Staphylococcus aureus RF122* | GCA_000009005.1 |
| *Staphylococcus aureus subsp. aureus 6850* | GCA_000462955.1 |
| *Staphylococcus aureus subsp. aureus CN1* | GCA_000463055.1 |
| *Staphylococcus aureus subsp. aureus COL* | GCA_000012045.1 |
| *Staphylococcus aureus subsp. aureus ED133* | GCA_000210315.1 |
| *Staphylococcus aureus subsp. aureus ED98* | GCA_000024585.1 |
| *Staphylococcus aureus subsp. aureus JH9* | GCA_000016805.1 |
| *Staphylococcus aureus subsp. aureus JKD6159* | GCA_000144955.2 |
| *Staphylococcus aureus subsp. aureus LGA251* | GCA_000237265.1 |
| *Staphylococcus aureus subsp. aureus M013* | GCA_000237125.3 |
| *Staphylococcus aureus subsp. aureus MRSA252* | GCA_000011505.1 |
| *Staphylococcus aureus subsp. aureus MSSA476* | GCA_000011525.1 |
| *Staphylococcus aureus subsp. aureus Mu50* | GCA_000009665.1 |
| *Staphylococcus aureus subsp. aureus N315* | GCA_000009645.1 |
| *Staphylococcus aureus subsp. aureus SA40* | GCA_000470865.1 |
| *Staphylococcus aureus subsp. aureus SA957* | GCA_000470845.1 |
| *Staphylococcus aureus subsp. aureus str. JKD6008* | GCA_000145595.1 |
| *Staphylococcus aureus subsp. aureus str. Newman* | GCA_000010465.1 |
| *Staphylococcus aureus subsp. aureus T0131* | GCA_000204665.1 |
| *Staphylococcus aureus subsp. aureus TCH60* | GCA_000159535.2 |
| *Staphylococcus aureus subsp. aureus TW20* | GCF_000027045.1 |
| *Staphylococcus aureus subsp. aureus USA300_TCH1516* | GCF_000017085.1 |
| *Staphylococcus aureus subsp. aureus Z172* | GCF_000485885.1 |
| *Staphylococcus xyloses* | GCF_047047065.1 |

**Table 1. Curated *Staphylococcus* references with NCBI accessions.** The majority of references are *Staphylococcus aureus* and are designated to the strain level.

1. Navigate to the NCBI-nucleotide search page: <https://www.ncbi.nlm.nih.gov/datasets/genome/>
2. Paste assembly accessions from Table 1 into the search bar (Figure 3).

**Figure 3. Search target sequences in NCBI-Genome database.** Accession codes are entered into the search bar (outlined, red). Note that pasting a newline-delimited list into the search bar will be automatically formatted into a space-separated accession list.

1. The resulting page will contain entries for each of the specified accessions. Check the header box to select all results, then the “Download” dropdown (Figure 4).

**Figure 4. NCBI-Genome search result page for target database reference accessions.** Check the header box (outlined, red) to select all results, then the “Download” dropdown (outlined, orange) to initiate file type selection and downloading.

1. In the resulting “Download” prompt, select “RefSeq only”, “Genome Sequences (FASTA)”, and then “Download” (Figure 5). The downloaded folder will hereafter be referred to as “ncbi_genomes_Staphylococcus” (Figure 5).

**Figure 5. Download prompt for NCBI-Genome.** Select “Download Package” (outlined, red) to open the download prompt, then select “RefSeq only” (outlined, orange), “Genome Sequences (FASTA)”, name your output file “ncbi_genomes_Staphylococcus” (outlined, purple), and then “Download” (outlined, pink).

1. The resulting download folder needs to be decompressed and parsed to merge fasta sequences into a single target database. For this example, all analysis files and software should be placed within a single analysis folder of your choosing. Future directory specifications will be relative to this analysis folder.
   1. On the command line, begin by navigating to the folder containing the downloaded folder and decompress:

$ unzip ncbi_genomes_Staphylococcus.zip -d ncbi_genomes_Staphylococcus

- 1. Next, merge genomes into new multi-fasta file “ncbi_genomes_Staphylococcus.fa”:

$ cat ncbi_genomes_Staphylococcus/*/*/*/*.fna > ncbi_genomes_Staphylococcus.fasta

Create a target information file for custom *Staphylococcus* database

When using ATCC-based reference sequences, meta data for target database sequences are automatically parsed from reference fasta file headers. When using a custom database, this information needs to be manually curated into a tab-delimited file, which is specified by the parameter “--target_meta” during *ATCCfinder* search.R command execution. The target meta data file needs a minimum of 3 columns: “header_id”, “reference_id”, and “taxonomy”. “header_id” describes the beginning of the header line before the first space and is usually an accession number. “reference_id” refers to the reference accession number and is usually identical to “header_id” for NCBI-curated custom reference databases. “taxonomy” describes taxonomic information associated with the target sequence. Target meta data information is appended to alignment results; additional columns may be specified for any added information that users may wish to annotate alignment results with. The target meta data table is provided below (Table 2), the following steps describes more generally how to create this file oneself.

1. Extract header lines from *Staphylococcus* merged target database fasta file and export them into a newly created meta data file “ncbi_custom_target_database_Staphylococcus.tsv”:

$ cat ncbi_genomes_Staphylococcus.fasta | grep "^>" > custom_target_database_Staph.tsv

1. Open the “ncbi_custom_target_database_Staphylococcus.tsv” and, using the extracted header line information, manually parse this information into the required columns “header_id”, “reference_id”, and “taxonomy”. Table 2 provides an example meta data table, as used in this vignette.

| **header_id** | **reference_id** | **taxonomy** |
| --- | --- | --- |
| NC_007622.1 | NC_007622.1 | *Staphylococcus aureus RF122* |
| NC_002745.2 | NC_002745.2 | *Staphylococcus aureus subsp. aureus N315* |
| NC_003140.1 | NC_003140.1 | *Staphylococcus aureus subsp. aureus N315 plasmid pN315* |
| NC_002758.2 | NC_002758.2 | *Staphylococcus aureus subsp. aureus Mu50* |
| NC_002774.1 | NC_002774.1 | *Staphylococcus aureus subsp. aureus Mu50 plasmid VRSAp* |
| NC_009641.1 | NC_009641.1 | *Staphylococcus aureus subsp. aureus str. Newman* |
| NC_002952.2 | NC_002952.2 | *Staphylococcus aureus subsp. aureus MRSA252* |
| NC_002953.3 | NC_002953.3 | *Staphylococcus aureus subsp. aureus MSSA476* |
| NC_005951.1 | NC_005951.1 | *Staphylococcus aureus subsp. aureus MSSA476 plasmid pSAS* |
| NC_002951.2 | NC_002951.2 | *Staphylococcus aureus subsp. aureus COL* |
| NC_006629.2 | NC_006629.2 | *Staphylococcus aureus subsp. aureus COL plasmid pT181* |
| NC_009487.1 | NC_009487.1 | *Staphylococcus aureus subsp. aureus JH9* |
| NC_009477.1 | NC_009477.1 | *Staphylococcus aureus subsp. aureus JH9 plasmid pSJH901* |
| NC_010079.1 | NC_010079.1 | *Staphylococcus aureus subsp. aureus USA300_TCH1516* |
| NC_012417.1 | NC_012417.1 | *Staphylococcus aureus subsp. aureus USA300_TCH1516 plasmid pUSA01-HOU* |
| NC_010063.1 | NC_010063.1 | *Staphylococcus aureus subsp. aureus USA300_TCH1516 plasmid pUSA300HOUMR* |
| NC_013450.1 | NC_013450.1 | *Staphylococcus aureus subsp. aureus ED98* |
| NC_013453.1 | NC_013453.1 | *Staphylococcus aureus subsp. aureus ED98 plasmid pAVX* |
| NC_013451.1 | NC_013451.1 | *Staphylococcus aureus subsp. aureus ED98 plasmid pAVY* |
| NC_013452.1 | NC_013452.1 | *Staphylococcus aureus subsp. aureus ED98 plasmid pT181* |
| NC_017331.1 | NC_017331.1 | *Staphylococcus aureus subsp. aureus TW20* |
| NC_017352.1 | NC_017352.1 | *Staphylococcus aureus subsp. aureus TW20 plasmid pTW20_1* |
| NC_017332.1 | NC_017332.1 | *Staphylococcus aureus subsp. aureus TW20 plasmid pTW20_2* |
| NC_017338.2 | NC_017338.2 | *Staphylococcus aureus subsp. aureus JKD6159* |
| NC_017339.1 | NC_017339.1 | *Staphylococcus aureus subsp. aureus JKD6159 plasmid pSaa6159* |
| NC_017341.1 | NC_017341.1 | *Staphylococcus aureus subsp. aureus str. JKD6008* |
| NC_017342.1 | NC_017342.1 | *Staphylococcus aureus subsp. aureus TCH60* |
| NC_017345.1 | NC_017345.1 | *Staphylococcus aureus subsp. aureus TCH60 plasmid unnamed* |
| NC_017347.1 | NC_017347.1 | *Staphylococcus aureus subsp. aureus T0131* |
| NC_017337.1 | NC_017337.1 | *Staphylococcus aureus subsp. aureus ED133* |
| NC_016928.2 | NC_016928.2 | *Staphylococcus aureus subsp. aureus M013* |
| NZ_CP039996 | NZ_CP039996 | *1 Staphylococcus aureus subsp. aureus M013 plasmid pM013* |
| NC_017349.1 | NC_017349.1 | *Staphylococcus aureus subsp. aureus LGA251* |
| NC_017348.1 | NC_017348.1 | *Staphylococcus aureus subsp. aureus LGA251 plasmid pLGA251* |
| NC_018608.1 | NC_018608.1 | *Staphylococcus aureus 08BA02176* |
| NC_021670.1 | NC_021670.1 | *Staphylococcus aureus* |
| NC_021657.1 | NC_021657.1 | *Staphylococcus aureus plasmid pBmb9393* |
| NC_022222.1 | NC_022222.1 | *Staphylococcus aureus subsp. aureus 6850* |
| NC_022226.1 | NC_022226.1 | *Staphylococcus aureus subsp. aureus CN1* |
| NC_022227.1 | NC_022227.1 | *Staphylococcus aureus subsp. aureus CN1 plasmid unnamed* |
| NC_022228.1 | NC_022228.1 | *Staphylococcus aureus subsp. aureus CN1 plasmid unnamed2* |
| NC_022442.1 | NC_022442.1 | *Staphylococcus aureus subsp. aureus SA957* |
| NC_022443.1 | NC_022443.1 | *Staphylococcus aureus subsp. aureus SA40* |
| NC_022604.1 | NC_022604.1 | *Staphylococcus aureus subsp. aureus Z172* |
| NC_022610.1 | NC_022610.1 | *Staphylococcus aureus subsp. aureus Z172 plasmid pZ172_1* |
| NC_022605.1 | NC_022605.1 | *Staphylococcus aureus subsp. aureus Z172 plasmid pZ172_2* |
| NZ_CP038460.1 | NZ_CP038460.1 | *Staphylococcus aureus strain B119 chromosome* |
| NZ_CP029751.1 | NZ_CP029751.1 | *Staphylococcus aureus strain Smith chromosome* |
| NZ_CP029750.1 | NZ_CP029750.1 | *Staphylococcus aureus strain Smith plasmid pSS41* |
| NZ_CP146481.1 | NZ_CP146481.1 | *Staphylococcus xylosus strain MS1 chromosome* |
| NZ_CP146482.1 | NZ_CP146482.1 | *Staphylococcus xylosus strain MS1 plasmid pMS1* |

**Table 2. Custom target database meta data table.** This tab-delimited table is specified via parameter “—target_meta" during *ATCCfinder* search.R execution. Columns describe the beginning of the header line before the first space and is usually an accession number (header_id), the reference accession number (reference_id), and taxonomic information associated with the target sequence (taxonomy).

Use *ATCCfinder* to query a custom *Staphylococcus* database

1. ATCCfinder is available on GitHub at: <https://github.com/lanl/ATCCfinder> **and on Zenodo at https://doi.org/10.5281/zenodo.15178103**. Navigate to the web page and select the “Code” drop down menu, then “Download ZIP” to download the software (Figure 6).

**Figure 6. Download ATCCfinder software from GitHub.** Select the “Code” dropdown (outlined, red) and then “Download ZIP” (outlined, orange) to download *ATCCfinder*.

1. Decompress the downloaded ZIP folder for *ATCCfinder* and enable execution permissions:

$ unzip ATCCfinder-main.zip -d ATCCfinder-main

$ chmod -R +x ATCCfinder-main/

1. Ensure all required files and folders are in the same directory (Figure 7), as described in previous steps (Download query sequence from NCBI-Nucleotide database, Download *Staphylococcus* target database sequences from NCBI-Genome database, and Create a target information file for custom *Staphylococcus* database).


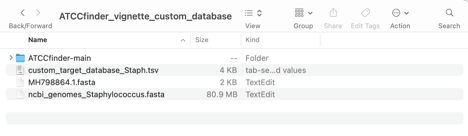


**Figure 7. Example folder directory containing required vignette files and software for running *ATCCfinder* search.R**.

1. Create and activate a software environment for executing *ATCCfinder* search:

## Define environment

$ mamba create -n ATCCfinder_search

$ mamba activate ATCCfinder_search

## Install packages

$ mamba install -c bioconda minimap2

$ mamba install -c bioconda samtools

$ mamba install r-base r-argparse

1. From the command line, navigate to the folder containing vignette files and software. Execute ATCCfinder from the command line:

$ ATCCfinder-main/ATCCfinder-main/search.R \

--query MH798864.1.fasta \

--target ncbi_genomes_Staphylococcus.fasta \

--target_meta custom_target_database_Staph.tsv\

--nhits 100 \

--overwrite T \

--outdir output_Staphylococcus

1. Successful execution of the above command will yield a new folder titled “output_Staphylococcus” containing analysis results (Figure 8). Output file “alignment.paf” contains the raw alignment results generated by searching the query sequence against the custom database, “alignment_annotated.tsv” contains alignment results with additional meta data annotations and scoring metrics appended to it, and “ATCCfinder_summary.tsv” provides a result summary for each sequence queried. An example interpretation of the “ATCCfinder_summary.tsv” file for this analysis vignette is provided in Table 3.


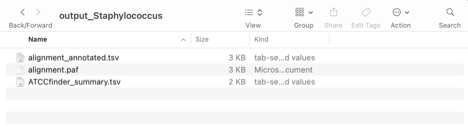


**Figure 8. Results folder after running ATCCfinder search.R.**

| **Column** | **Value** | **Description** |
| --- | --- | --- |
| qname | MH798864.1 | Query sequence name |
| qlen | 2007 | Query sequence length |
| n_total_hits | 18 | Total number of query alignments to target database. |
| max_mapq | 0 | Maximum mapping quality of alignments, ranging from 0-60, with 60 indicating a unique match. A value of 0 is not an issue and just indicates that multiple high-quality alignments exist for the query. |
| max_nmatch | 2006 | The maximum number of matching bases found in the query alignments to target references. |
| max_nmatch_% | 99.95 | The maximum number of matching bases found in the query alignments to target references as a fraction of the query sequence length. |
| n_best_refs | 2 | The number of target references with maximum score statistics. |
| taxonomy_consensus | Staphylococcus aureus | The unique first two words of taxonomy names present in “n_best_refs”. This metric aims to capture genus and species consensus. A single value of *Staphylococcus aureus* indicates that both maximum score references were both annotated as this species. |
| best_refs | (1) NC_002745.2; (1) NC_002758.2 | The names of the reference sequences with maximum scores. |
| best_refs_taxonomy | (1) *Staphylococcus aureus* subsp. aureus N315; (1) *Staphylococcus aureus* subsp. aureus Mu50 | The full taxonomic annotations of each of the references with maximum scores. |
| note | NOTE: Alignments with non-maximum scores but high nmatch percentages (>=95%) exist. See following columns and output file 'alignment_annotated.tsv' for more details. | The column flags whether or not additional references exist with non-maximum, but still high, alignment scores, as defined by “n_match_p” parameter values specified by “--note_nmatch_p”. |
| note_n_best_refs | 16 | Similar to “n_best_refs”, but for non-maximum notable references. |
| note_taxonomy_consensus | *Staphylococcus aureus* | Similar to “taxonomy_consensus”, but for non-maximum notable references. |
| note_best_refs | (1) NC_022604.1; (1) NC_010079.1; (1) NC_017331.1; (1) NC_017342.1; (1) NC_017347.1; (1) NC_017341.1; (1) NC_022442.1; (1) NC_022443.1; (1) NC_002952.2; (1) NC_016928.2; (1) NC_017338.2; (1) NC_009487.1; (1) NC_002951.2; (1) NC_022226.1; (1) NC_018608.1; (1) NC_021670.1 | Similar to “best_refs”, but for non-maximum notable references. |
| note_best_refs_taxonomy | (1) *Staphylococcus aureus* subsp. aureus Z172; (1) *Staphylococcus aureus* subsp. aureus USA300_TCH1516; (1) *Staphylococcus aureus* subsp. aureus TW20; (1) *Staphylococcus aureus* subsp. aureus TCH60; (1) *Staphylococcus aureus* subsp. aureus T0131; (1) *Staphylococcus aureus* subsp. aureus str. JKD6008; (1) *Staphylococcus aureus* subsp. aureus SA957; (1) *Staphylococcus aureus* subsp. aureus SA40; (1) *Staphylococcus aureus* subsp. aureus MRSA252; (1) *Staphylococcus aureus* subsp. aureus M013; (1) *Staphylococcus aureus* subsp. aureus JKD6159; (1) *Staphylococcus aureus* subsp. aureus JH9; (1) *Staphylococcus aureus* subsp. aureus COL; (1) *Staphylococcus aureus* subsp. aureus CN1; (1) *Staphylococcus aureus* 08BA02176; (1) *Staphylococcus aureus* | Similar to “best_refs_taxonomy”, but for non-maximum notable references. |

**Table 3. ATCCfinder Staphylococcus summary file “ATCCfinder_summary.tsv” description.**

1. Interpretation of “ATCCfinder_summary.tsv” (Table 3) would proceed as follows:

- ATCCfinder indicates that 2 / 28 target database references had maximum scored matches (n_best_refs) with 99.95% of bases (max_nmatch_%) or 2006 / 2007 bases (max_nmatch, qlen).
- Maximum scored matches are both annotated as *Staphylococcus aureus* (best_refs_taxonomy), specifically strains *subsp. aureus N315* with one alignments and *subsp. aureus Mu50* with alignment (best_refs_taxonomy).
- 16 additional alignments exist with matching sequences exceeding 95% (note_n_best_refs, note), all of which are additional strains of *Staphylococcus aureus* (note_taxonomy_consensus , note_best_refs_taxonomy).
- Taken together, results suggest that 18 / 28 target database references contained the queried gene “penicillin binding protein PBP2A (mecA)”.
